# Supplementary material
Source: PubMed Central journal article supplement (PMC6740246)

### Supplementary Figure 1A-1B

#### Multivariable association of left ventricular systolic function group with clinical outcomes, with and without adjustment for long-term medication use.

Figure 1A: Multivariable association of outcomes not adjusting for long-term medication use.

Figure 1B: Multivariable association of outcomes adjusting for long-term medication use. Adjusted hazard ratios are reported relative to patients with HF and preserved ejection fraction. 95% confidence intervals are shown in parentheses. ED = emergency department, HF = heart failure.

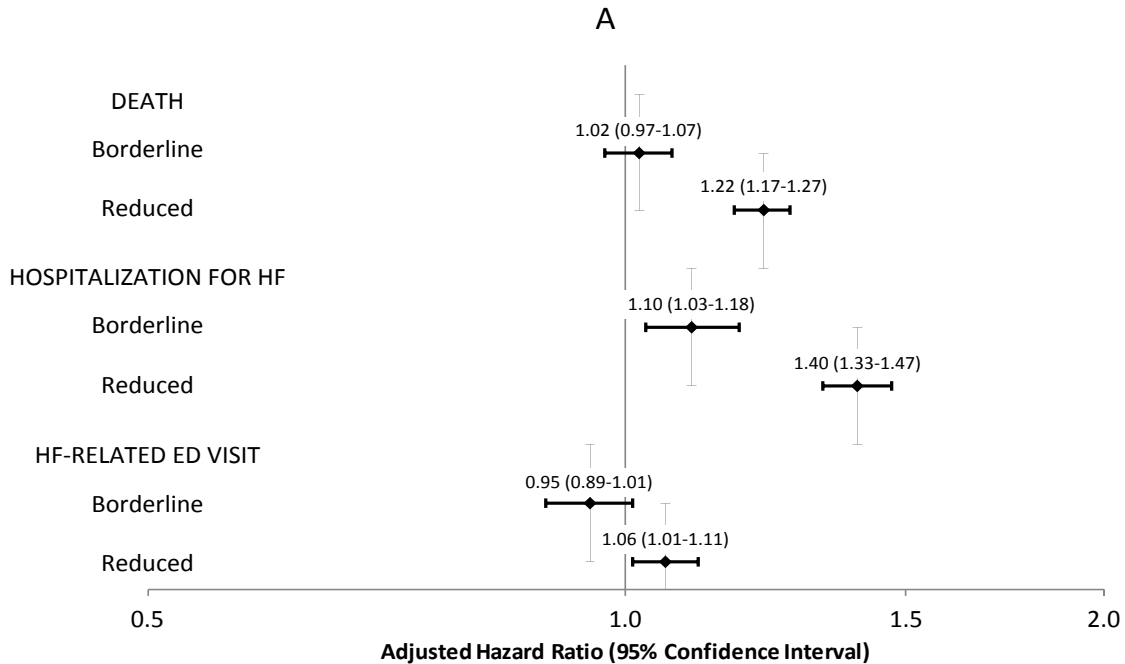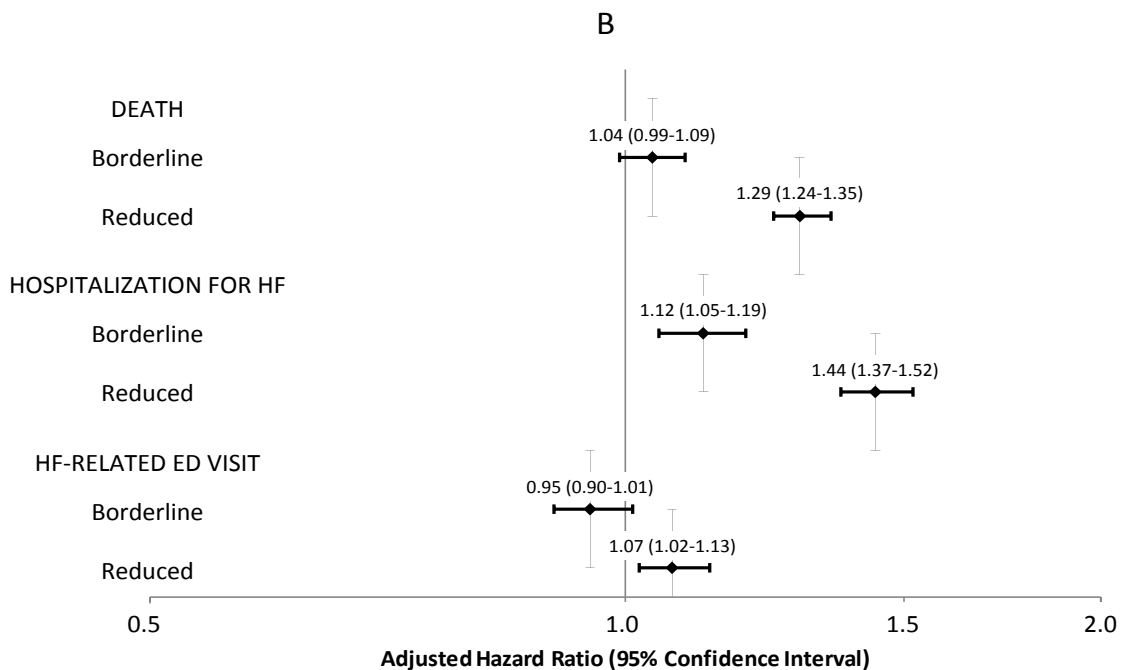

Supplement: NIHMS1048811-supplement-Supplemental_Figure_1.pdf [file NIHMS1048811-supplement-Supplemental_Figure_1.pdf]
